# Supplementary material for: An indirect competitive ELISA for determination of guanidine acetic acid in animal feed
Source: Research Square preprint supplement (doi:10.21203/rs.3.rs-5096651/v1), 2025-04-23
Supplement: Supplementary file 1 [file 1c5794c93cce1541b89a97cc.xlsx]

## Sheet: Sheet1
S Table 2. The indirect ELISA titer of mAbs against guanidine acetic acid
hydridoma lines	OD450 nm value	titer of supernatant	titer of astices
1E3	2.237	1:1.28 × 102	1:1.2 × 105
2C4	2.528	1:5.12 × 102	1:2.4 × 105
2D7	2.376	1:2.56 × 102	1:1.8 × 105
4E6	2.265	1:1.28 × 102	1:1.2 × 105
