# Supplementary material for: An indirect competitive ELISA for determination of guanidine acetic acid in animal feed
Source: Research Square preprint supplement (doi:10.21203/rs.3.rs-5096651/v1), 2025-04-23
Supplement: Supplementary file 2 [file 704a80d80723f59492c075ef.xlsx]

## Sheet: Sheet1
S Table 4. Recovery of the ic-ELISA for guanidine acetic acid spiked in animal feed samples
Spiked guanidine acetic acid (μg/kg)	Intra-assay	Inter-assay
5.0	4.59	4.61
	4.20	4.08
	3.59	3.43
	4.31	4.21
	4.01	3.99
	3.98	3.91
10.0	9.04	9.01
	8.16	8.10
	9.43	7.65
	8.51	9.16
	8.06	8.01
	8.15	8.18
47.0	44.18	43.24
	40.12	45.06
	45.08	39.32
	45.11	42.97
	44.13	41.18
	47.45	46.37
