# Supplementary material for: An indirect competitive ELISA for determination of guanidine acetic acid in animal feed
Source: Research Square preprint supplement (doi:10.21203/rs.3.rs-5096651/v1), 2025-04-23
Supplement: Supplementary file 3 [file 8b463479f025e54e6260d9b7.xlsx]

## Sheet: Sheet1
S Table 5. Comparison of the ic-ELISA with HPLC for three levels of guanidine acetic acid residues in animal feed samples
Guanidine acetic acid concentration (μg/kg)	ic-ELISA	HPLC
8.5	7.10	7.43
	7.82	8.38
	6.71	7.74
23.5	20.05	20.95
	22.37	23.37
	19.65	21.86
60.5	54.18	55.64
	57.51	58.89
	52.26	57.91
