# Supplementary material for: An indirect competitive ELISA for determination of guanidine acetic acid in animal feed
Source: Research Square preprint supplement (doi:10.21203/rs.3.rs-5096651/v1), 2025-04-23
Supplement: Supplementary file 4 [file b6809c858f10e102276cb53b.docx]

S1 Fig. Inhibition curve of polyantiserum from immunised mice #1

S2 Fig. Inhibition curve of polyantiserum from immunised mice #2

S3 Fig. Inhibition curve of polyantiserum from immunised mice #3

S4 Fig. Inhibition curves of mAb 1E3

S5 Fig. Inhibition curves of mAb 2C4

S6 Fig. Inhibition curves of mAb 2D7

S7 Fig. Inhibition curves of mAb 4E6
