# Supplementary material for: An indirect competitive ELISA for determination of guanidine acetic acid in animal feed
Source: Research Square preprint supplement (doi:10.21203/rs.3.rs-5096651/v1), 2025-04-23
Supplement: Supplementary file 5 [file f0f91206037ae8f7241d7ceb.xlsx]

## Sheet: Sheet1
	Determination of sensitivity of mice sera against guanidine acetic acid
		Mice No.	guanidine acetic acid standard concentration (μg/kg)
			160	80	40	20	10	5	0
		1	0.236	0.342	0.493	0.592	0.791	0.892	1.015
		2	0.076	0.185	0.397	0.553	0.624	0.835	0.974
		3	0.073	0.195	0.408	0.571	0.663	0.869	0.964
	1. IC50 value of 36.60 μg/kg for serum from immunised mice #1 (Fig. 1)
		160	2.20412	0.232512	0.236
		80	1.90309	0.336946	0.342
		40	1.60206	0.485714	0.493
		20	1.30103	0.583251	0.592
		10	1	0.77931	0.791
		5	0.69897	0.878818	0.892
		0		1.00694	1.015
	2. IC50 value of 38.41 μg/kg for serum from immunised mice #2 (Fig. 2)
		160	2.20412	0.237769	0.243
		80	1.90309	0.390411	0.399
		40	1.60206	0.495108	0.506
		20	1.30103	0.621331	0.635
		10	1	0.732877	0.749
		5	0.69897	0.803327	0.821
		0			1.022
	3. IC50 value of 41.32 μg/kg for serum from immunised mice #3 (Fig. 3)
		160	2.20412	0.273346	0.281
		80	1.90309	0.418288	0.43
		40	1.60206	0.508755	0.523
		20	1.30103	0.601167	0.618
		10	1	0.708171	0.728
		5	0.69897	0.780156	0.802
		0			1.028
