# Supplementary material for: An indirect competitive ELISA for determination of guanidine acetic acid in animal feed
Source: Research Square preprint supplement (doi:10.21203/rs.3.rs-5096651/v1), 2025-04-23
Supplement: Supplementary file 6 [file f0ff79030fbfb85df4cb12f2.xlsx]

## Sheet: Sheet1
	S Table 3. Inhibitive titers of mAbs against guanidine acetic acid
	hydridoma lines	Guanidine acetic acid standard concentration(μg/kg)
		160	80	40	20	10	5	0
	1E3	0.175	0.263	0.368	0.459	0.507	0.611	1.018
	2C4	0.095	0.169	0.256	0.315	0.407	0.513	1.011
	2D7	0.156	0.247	0.351	0.433	0.492	0.623	1.025
	4E6	0.168	0.271	0.375	0.461	0.512	0.618	1.027
	1. IC50 value of 11.46 μg/kg for mAb 1E3 (Fig. 1)
	160	2.20412	0.171906	0.175
	80	1.90309	0.25835	0.263
	40	1.60206	0.361493	0.368
	20	1.30103	0.450884	0.459
	10	1	0.498035	0.507
	5	0.69897	0.600196	0.611
	0			1.018
	2. IC50 value of 4.65 μg/kg for mAb 2C4 (Fig. 2)
	160	2.20412	0.0939664	0.095
	80	1.90309	0.167161	0.169
	40	1.60206	0.253215	0.256
	20	1.30103	0.311573	0.315
	10	1	0.402572	0.407
	5	0.69897	0.507418	0.513
	0			1.011
	3. IC50 value of 10.49 μg/kg for mAb 2D7 (Fig. 3)
	160	2.20412	0.152195	0.156
	80	1.90309	0.240976	0.247
	40	1.60206	0.342439	0.351
	20	1.30103	0.422439	0.433
	10	1	0.48	0.492
	5	0.69897	0.607805	0.623
	0			1.025
	4. IC50 value of 11.57 μg/kg for mAb 4E6 (Fig. 4)
	160	2.20412	0.163583	0.168
	80	1.90309	0.263875	0.271
	40	1.60206	0.365141	0.375
	20	1.30103	0.44888	0.461
	10	1	0.498539	0.512
	5	0.69897	0.601753	0.618
	0			1.027
